# Supplementary material for: Quantitative Analysis of the Research Development Status and Trends of Tannery Wastewater Treatment Technology
Source: MDPI journal article supplement (doi:10.3390/catal12111317), 2022-10-27
Supplement: s1 [file s1]

# Quantitative Analysis of the Research Development Status and Trends of Tannery Wastewater Treatment Technology

Ming Li <sup>1,2</sup>, Xiang Jia <sup>1</sup>, Jingrui Wang <sup>3</sup>, Yang Wang <sup>1</sup>, Yuting Chen <sup>1</sup>, Junhao Wu <sup>1</sup>, Ying Wang <sup>1</sup>, Mengnan Shen <sup>1,\*</sup> and Honghai Xue <sup>1,\*</sup>

<sup>1</sup> Key Laboratory of Songliao Aquatic Environment Ministry of Education, School of Municipal and Environmental Engineering, Jilin Jianzhu University, Changchun 130118, China

<sup>2</sup> College of New Energy and Environmental Engineering, Nanchang Institute of Technology, Nanchang 330044, China

<sup>3</sup> Aerospace HIWING Security Technology Engineering Co. Ltd., Beijing 100070, China

\* Correspondence: smn930@aliyun.com (M.S.); xuehonghai@jlu.edu.cn (H.X.)

**Table S1.** Keywords information of tannery wastewater research.

| Serial Number | Number of Nodes | Mean Contour Value | Average Year | Main Content                                                                                                                                                                                |
|---------------|-----------------|--------------------|--------------|---------------------------------------------------------------------------------------------------------------------------------------------------------------------------------------------|
| 0             | 17              | 0.964              | 2002         | biodegradability; cept; toxicity; ozonation; advanced oxidation processes; biological treatment; organic pollutants; COD fractionation; vallisneria spiralis; alternanthera sessilis;       |
| 1             | 16              | 0.952              | 2007         | treatment; tanneries; microbial fuel cell; environment; sustainability; wastewater; tannery wastewater; ceramic membrane; microfiltration; UV/O <sub>3</sub> /H <sub>2</sub> O <sub>2</sub> |
| 2             | 13              | 0.916              | 2011         | phytoremediation; leather industry; chromium removal; fungi; activated sludge;                                                                                                              |
| 3             | 12              | 0.874              | 2013         | nzvi; heterogeneous-fenton; tannery wastewater; Cr(vi); column membrane bioreactor; activated sludge process; electrocoagulation; tannery wastewater treatment; chromium recovery           |
| 4             | 11              | 0.837              | 2007         | tannery waste-water; Ti/Pt electrodes; Ti/Pt /Ir electrodes; electrochemical processes; ammonium elimination                                                                                |
| 5             | 11              | 0.905              | 2007         | biomass; biodiesel; coagulation; aluminium formate; fame profile                                                                                                                            |
| 6             | 9               | 0.951              | 2013         | anaerobic digestion; biogas; kinetics; influent pH; nutrient supply                                                                                                                         |
| 7             | 7               | 0.981              | 1993         | coagulation-flocculation; adsorption; dye; heavy metal; chromium (vi)                                                                                                                       |
| 8             | 6               | 0.981              | 2016         |                                                                                                                                                                                             |
| 9             | 5               | 0.949              | 2013         |                                                                                                                                                                                             |
| 10            | 5               | 0.938              | 2007         |                                                                                                                                                                                             |
